# Supplementary material for: Syntheses and electrochemical properties of (Nb1−yTiy)4C3Tx solid solution MXenes
Source: Royal Society of Chemistry journal article supplement (doi:10.1039/d5nj00139k), 2025-01-01
Supplement: d5nj00139k1.pdf [file d5nj00139k1.pdf]

## Supplementary Information

# Syntheses and Electrochemical Properties of (Nb<sub>1-y</sub>Ti<sub>y</sub>)<sub>4</sub>C<sub>3</sub>T<sub>x</sub> Solid Solution MXenes

*Si Guo, Chao Deng, Gang Shi, Dawei Wang, Likui Wang\**

The Key Laboratory of Synthetic and Biological Colloids, Ministry of Education,  
School of Chemical and Materials Engineering, Jiangnan University, Wuxi, 214122,  
China

\*Corresponding author. E-mail address: [lkwang@jiangnan.edu.cn](mailto:lkwang@jiangnan.edu.cn) (L. Wang)

In the preparation of MAX phase precursors, the atomic ratio of Nb: Ti: Al: C is maintained at 4-4y:4y:1.5:2.7, where y takes values of 0.1, 0.2, and 0.3. Under these conditions, it is possible to obtain 413 phases without 312 phase impurities. However, when the y value is 0.4, a mixture of the 413 and 312 MAX phases is formed, as shown in Fig. S1. For y values of 0.6 and 0.8, only the 312 phase is obtained. Similar results are observed when 5 at% TiO<sub>2</sub> (Fig. S2) or 5 at% Nb<sub>2</sub>O<sub>5</sub> (Fig. S3) is added to the precursors.

The pure 413 MAX phase, (Nb<sub>0.6</sub>Ti<sub>0.4</sub>)<sub>4</sub>AlC<sub>3</sub> was successfully synthesized with the atomic ratio of Nb : Nb<sub>2</sub>O<sub>5</sub> : Ti : Al : C equal to 2.85 : 0.075 : 2 : 1.2 : 3.5, as shown in Fig. 1a. Furthermore, when y = 0.6 or 0.8, regardless of the ratios, pure 413 MAX phase cannot be formed.<sup>1</sup>

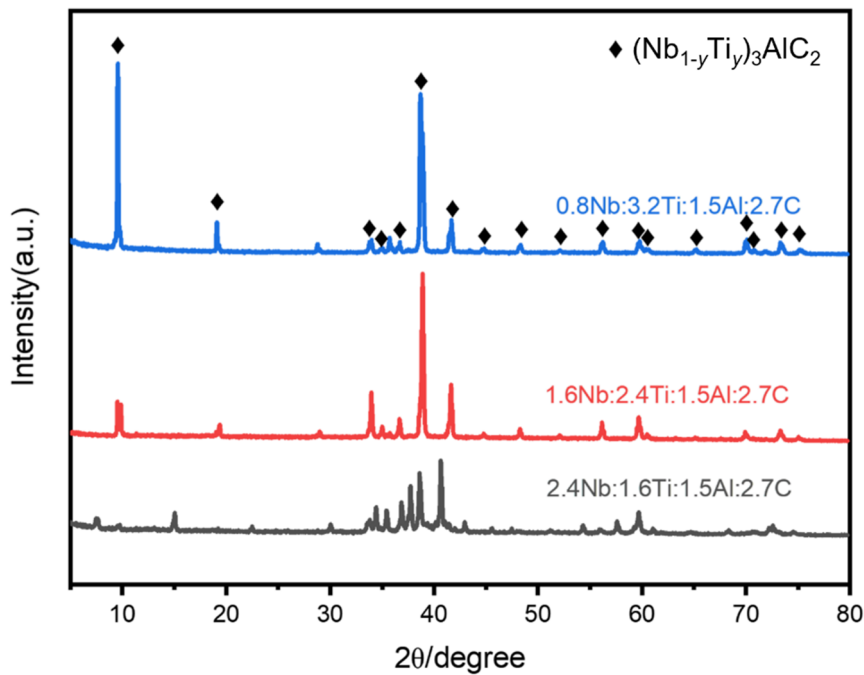

**Fig. S1** XRD spectra of MAX phase materials obtained with varying Ti/(Nb+Ti) ratios without oxide).

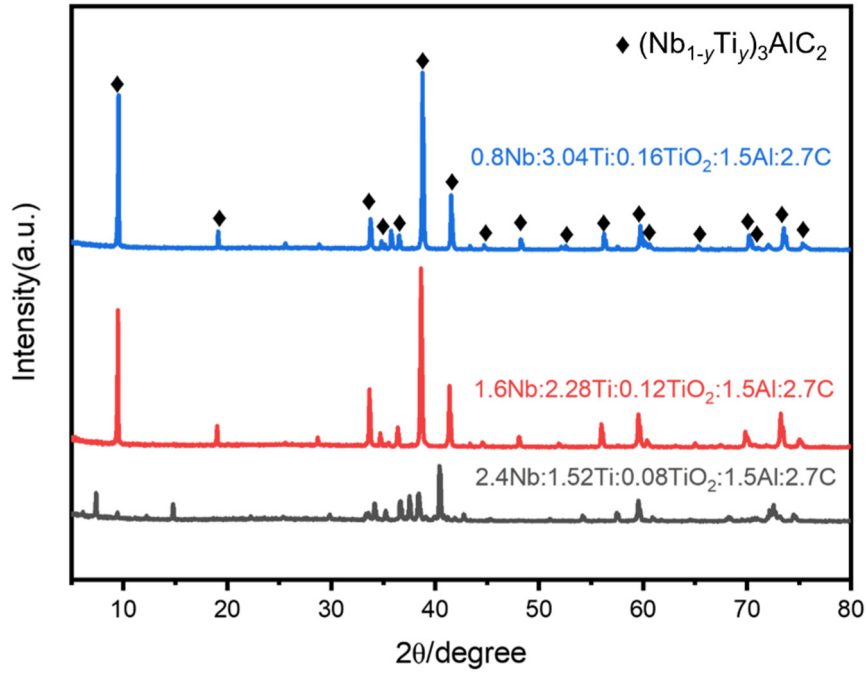

**Fig. S2** XRD spectra of MAX phase materials obtained with varying Ti/(Nb+Ti) ratios, where 5at% of Ti was replaced with TiO<sub>2</sub>.

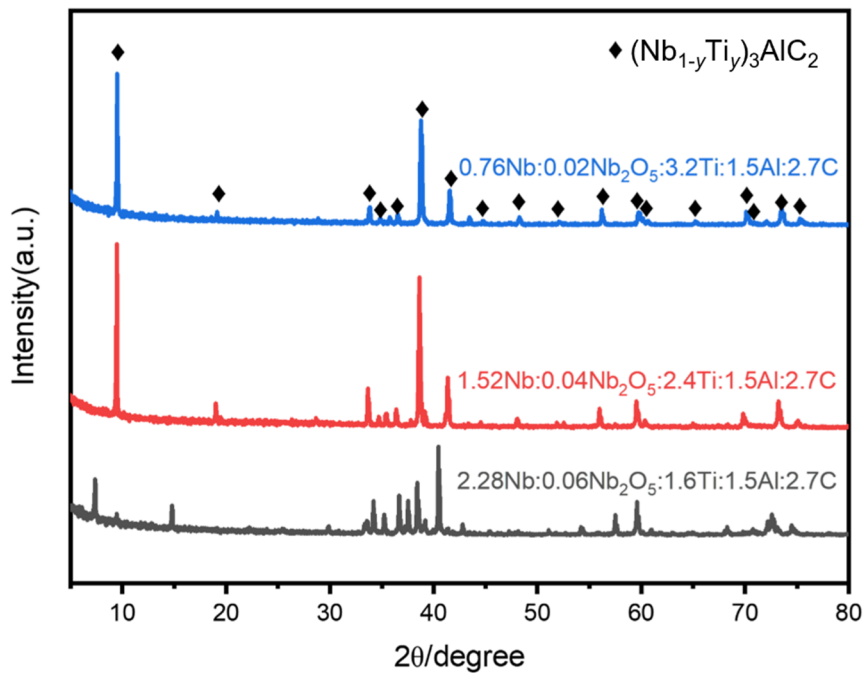

**Fig. S3** XRD spectra of MAX phase materials obtained with varying Ti/(Nb+Ti) ratios, where 5at% of Nb was replaced with Nb<sub>2</sub>O<sub>5</sub>.

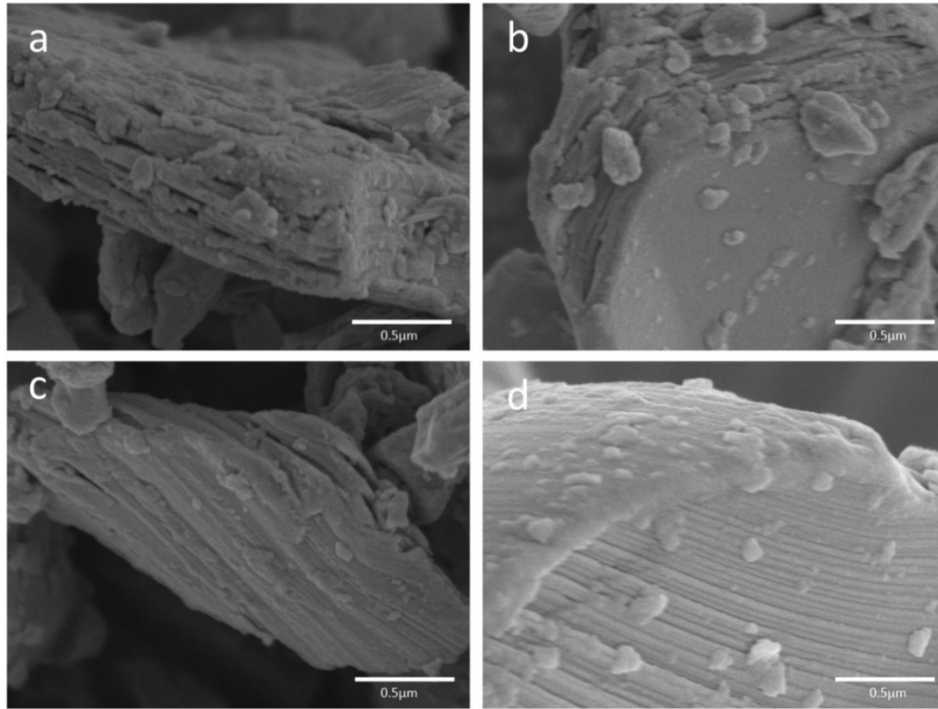

**Fig. S4** SEM images of (a)  $\text{Nb}_4\text{AlC}_3$ , (b)  $(\text{Nb}_{0.9}\text{Ti}_{0.1})_4\text{AlC}_3$ , (c)  $(\text{Nb}_{0.8}\text{Ti}_{0.2})_4\text{AlC}_3$  and (d)  $(\text{Nb}_{0.6}\text{Ti}_{0.4})_4\text{AlC}_3$

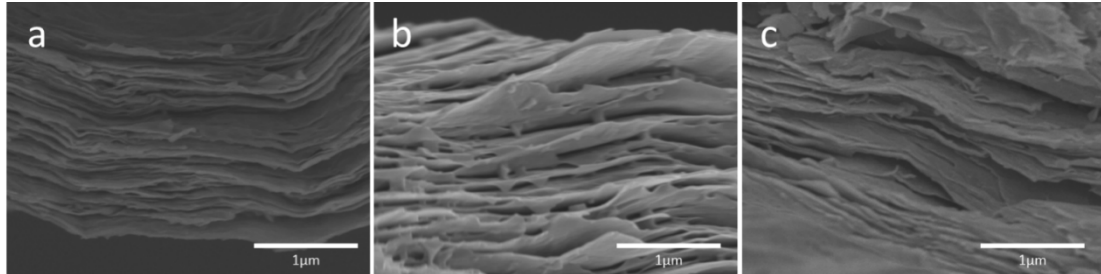

**Fig. S5** SEM cross section view of (a)  $\text{Nb}_4\text{C}_3\text{T}_x$ , (b)  $(\text{Nb}_{0.9}\text{Ti}_{0.1})_4\text{C}_3\text{T}_x$  and (c)  $(\text{Nb}_{0.8}\text{Ti}_{0.2})_4\text{C}_3\text{T}_x$ .

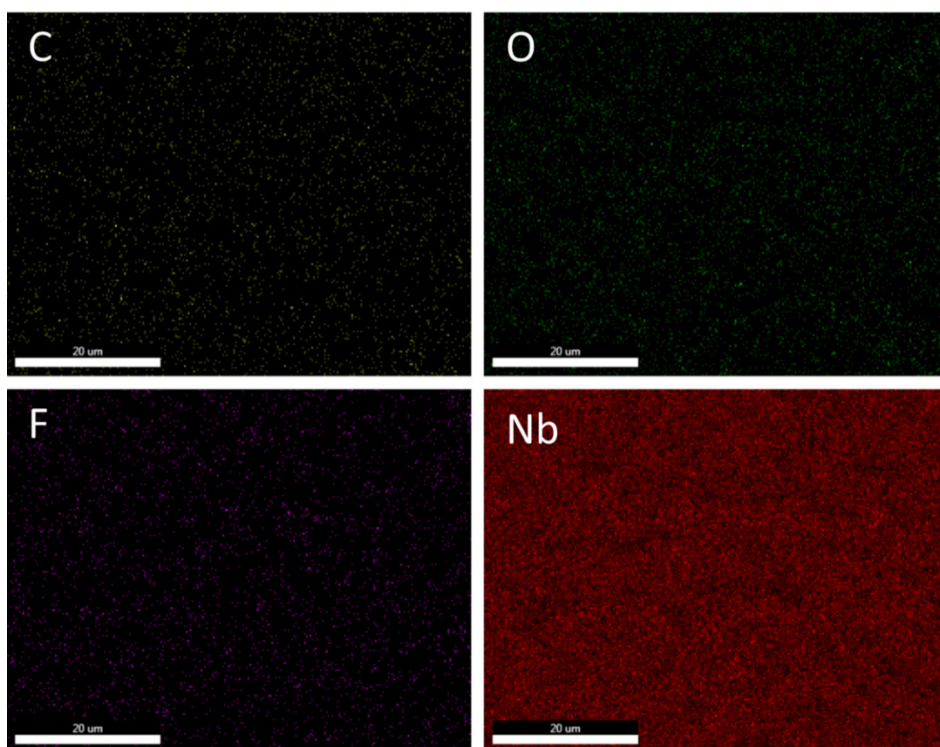

**Fig. S5** The EDS element mapping of  $\text{Nb}_4\text{C}_3\text{T}_x$ .

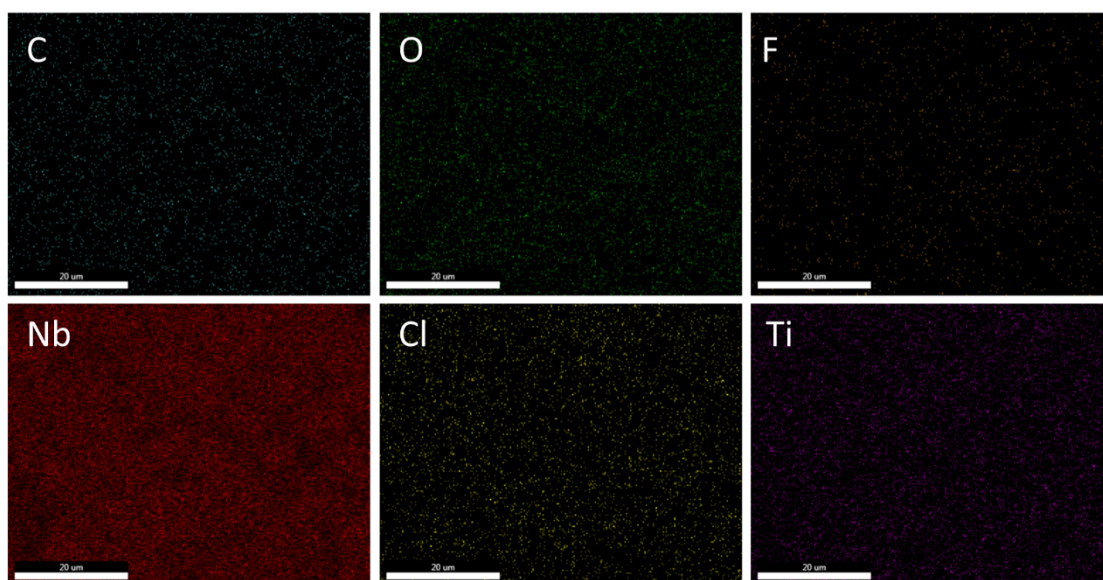

**Fig. S7** The EDS element mapping of  $(\text{Nb}_{0.9}\text{Ti}_{0.1})_4\text{C}_3\text{T}_x$ .

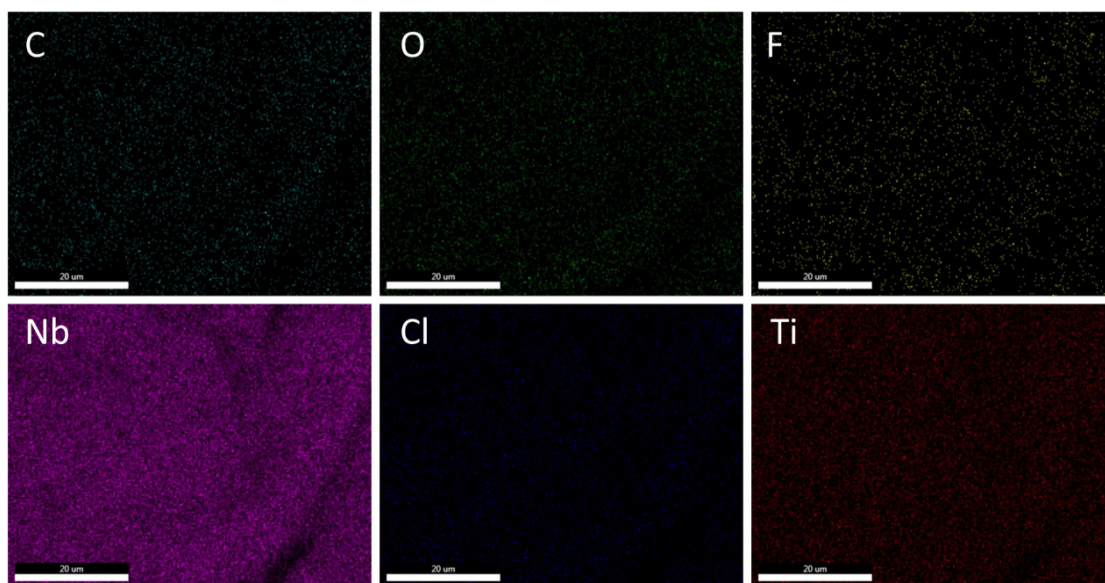

**Fig. S8** The EDS element mapping of  $(\text{Nb}_{0.8}\text{Ti}_{0.2})_4\text{C}_3\text{T}_x$ .

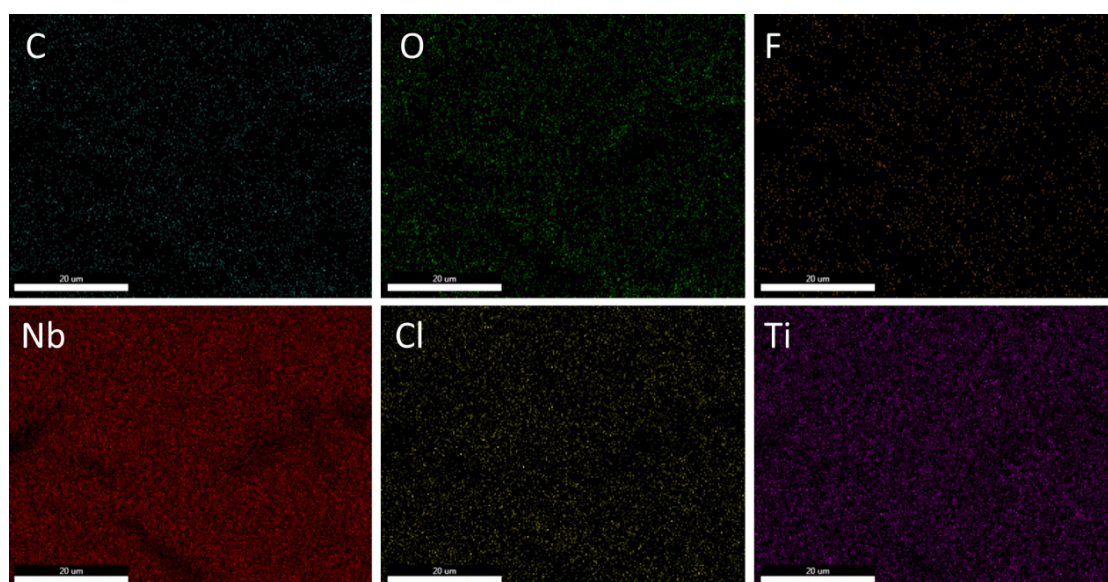

**Fig. S9** The EDS element mapping of  $(\text{Nb}_{0.7}\text{Ti}_{0.3})_4\text{C}_3\text{T}_x$ .

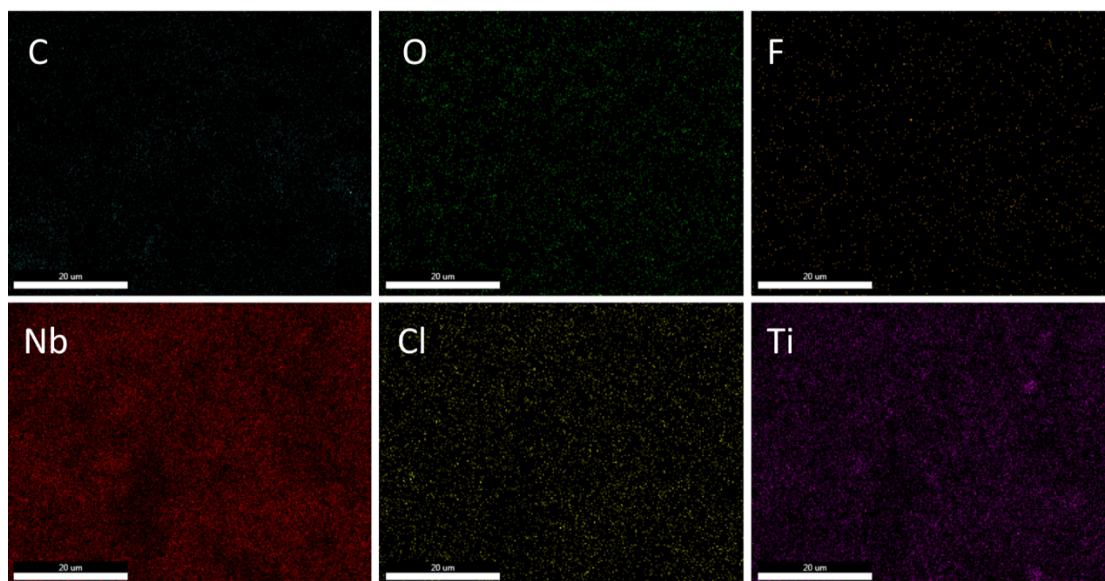

**Fig. S10** The EDS element mapping of  $(\text{Nb}_{0.6}\text{Ti}_{0.4})_4\text{C}_3\text{T}_x$ .

**Table S1** Mass load of  $(\text{Nb}_{1-y}\text{Ti}_y)_4\text{C}_3\text{T}_x$  for the working electrode

|                                                          | Quality (mg) | Area( $\text{cm}^2$ ) |
|----------------------------------------------------------|--------------|-----------------------|
| $\text{Nb}_4\text{C}_3\text{T}_x$                        | 0.294        | 0.283                 |
| $(\text{Nb}_{0.9}\text{Ti}_{0.1})_4\text{C}_3\text{T}_x$ | 0.705        | 0.283                 |
| $(\text{Nb}_{0.8}\text{Ti}_{0.2})_4\text{C}_3\text{T}_x$ | 0.270        | 0.2827                |
| $(\text{Nb}_{0.7}\text{Ti}_{0.3})_4\text{C}_3\text{T}_x$ | 0.290        | 0.283                 |
| $(\text{Nb}_{0.6}\text{Ti}_{0.4})_4\text{C}_3\text{T}_x$ | 0.270        | 0.283                 |

**Table S2** The elemental composition of  $(\text{Nb}_{1-y}\text{Ti}_y)_4\text{C}_3\text{T}_x$  MXenes based on EDS analysis

|                                                          | Nb    | Ti    | C     | O     | F    | Cl   | Ti/(Nb+Ti) |
|----------------------------------------------------------|-------|-------|-------|-------|------|------|------------|
| $\text{Nb}_4\text{C}_3\text{T}_x$                        | 33.98 | -     | 42.73 | 22.02 | 1.28 | -    | -          |
| $(\text{Nb}_{0.9}\text{Ti}_{0.1})_4\text{C}_3\text{T}_x$ | 32.22 | 3.79  | 39.56 | 23.85 | 0.00 | 0.63 | 10.52%     |
| $(\text{Nb}_{0.8}\text{Ti}_{0.2})_4\text{C}_3\text{T}_x$ | 33.8  | 8.78  | 34.85 | 20.82 | 0.55 | 1.21 | 20.62%     |
| $(\text{Nb}_{0.7}\text{Ti}_{0.3})_4\text{C}_3\text{T}_x$ | 21.75 | 10.50 | 41.58 | 23.75 | 0.77 | 1.65 | 32.56%     |
| $(\text{Nb}_{0.6}\text{Ti}_{0.4})_4\text{C}_3\text{T}_x$ | 10.62 | 8.75  | 59.69 | 17.83 | 1.92 | 1.2  | 45.17%     |



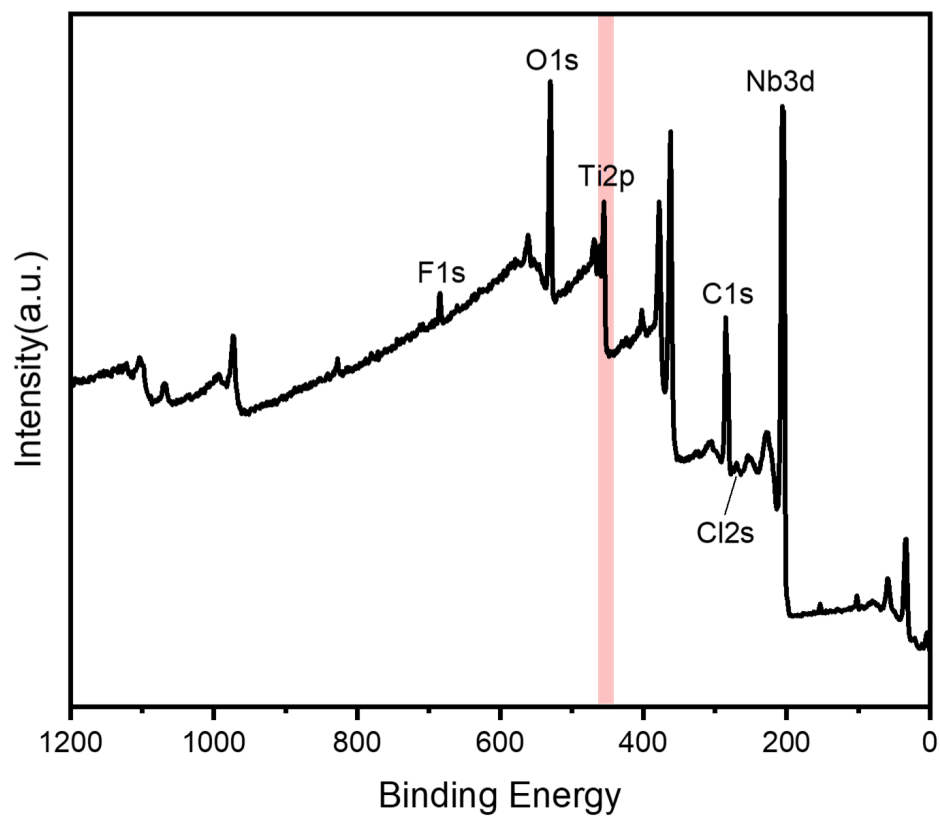

**Fig. S11** XPS full spectrum of  $(\text{Nb}_{0.7}\text{Ti}_{0.3})_4\text{C}_3\text{T}_x$ .

**Table S3** The elemental composition of  $(\text{Nb}_{0.7}\text{Ti}_{0.3})_4\text{C}_3\text{T}_x$  based on XPS analysis.

|                                                          | Nb    | Ti   | C     | O     | F     | Cl   | Ti/(Nb+Ti) |
|----------------------------------------------------------|-------|------|-------|-------|-------|------|------------|
| $(\text{Nb}_{0.7}\text{Ti}_{0.3})_4\text{C}_3\text{T}_x$ | 22.12 | 8.87 | 24.98 | 24.67 | 16.67 | 2.68 | 28.62%     |

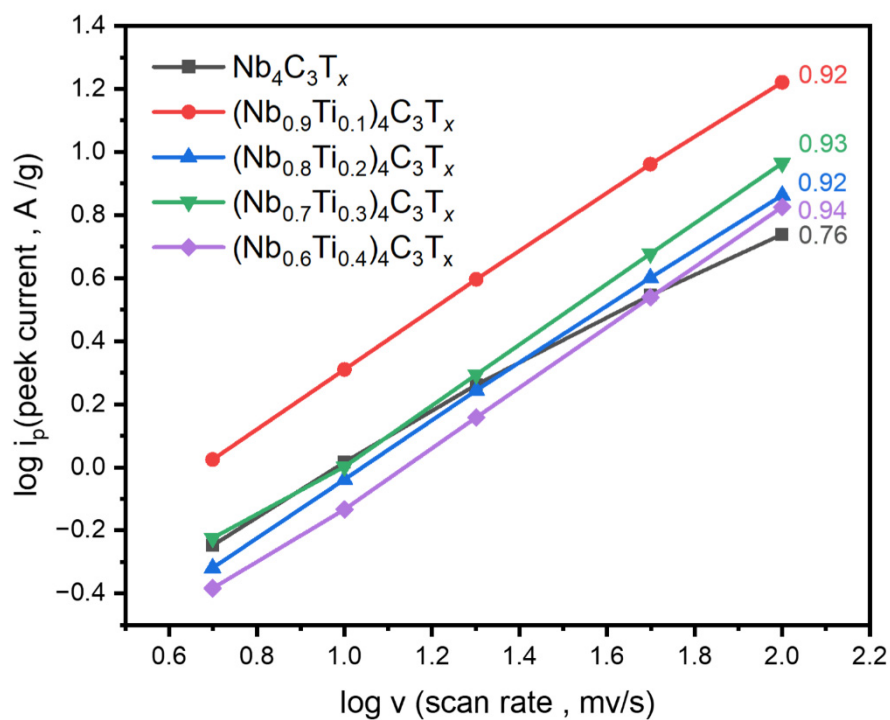

**Fig. S12** b-value determination by plotting log (specific current) versus log (scan rate) and the current and scan rate was taken from CV profiles in Fig. 4(a~e).

## References

1. M. Downes, C. E. Shuck, R. W. Lord, M. Anayee, M. Shekhirev, R. J. Wang, T. Hryhorchuk, M. Dahlqvist, J. Rosen and Y. Gogotsi, *Acs Nano*, 2023, **17**, 17158-17168.
